# Supplementary material
Source: PubMed Central journal article supplement (PMC4195467)
Supplement: Supp_Figure1.pdf [file Supp_Figure1.pdf]

## Supplementary Data

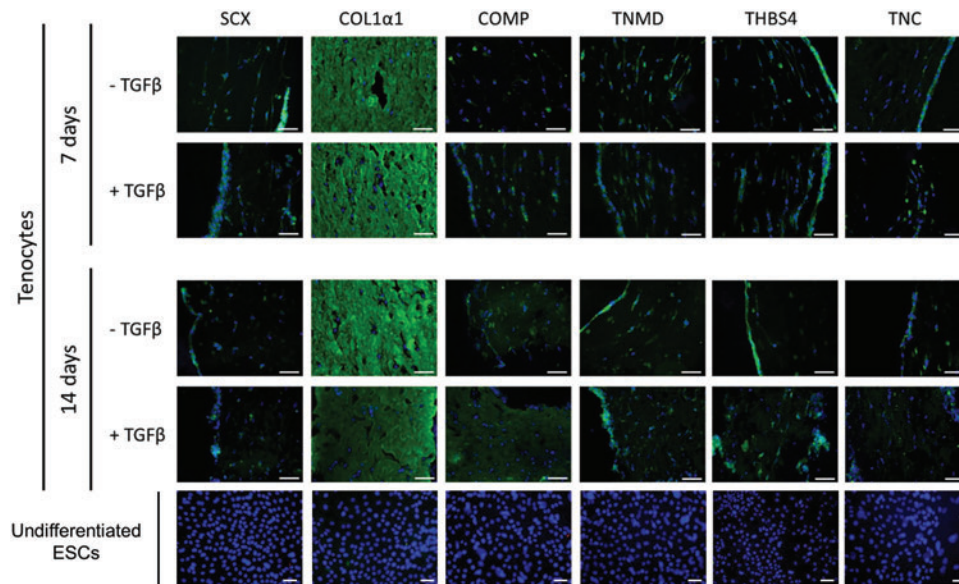

**SUPPLEMENTARY FIG. S1.** Immunohistochemistry of longitudinal sections of three-dimensional tenocyte constructs shows the presence of tendon-associated proteins at both 7 and 14 days of culture. The intensity of each protein appears unaffected by the presence of transforming growth factor beta3. Undifferentiated embryo-derived stem cells do not express any of the tendon-associated proteins. DAPI staining of the nuclei is shown in blue. Data shown are representative of testing on three cell lines. Scale bar=40  $\mu$ m. Images shown are representative of three biological repeats.
